# Supplementary material for: Date Palm Trees Root-Derived Endophytes as Fungal Cell Factories for Diverse Bioactive Metabolites
Source: PubMed Central journal article supplement (PMC6073733; doi:10.3390/ijms19071986), 2018-07-07
Supplement: ijms-19-01986-s001.pdf [file ijms-19-01986-s001.pdf]

**Supplementary Table 1.** LC-MS analysis of *Geotrichum candidum* extracts.

| Rt   | HRESIMS  | Tentative identification                             | Formula of the molecule                                       | Structure of the molecule                                                             | References             |                        |                         |                            |                       |              |
|------|----------|------------------------------------------------------|---------------------------------------------------------------|---------------------------------------------------------------------------------------|------------------------|------------------------|-------------------------|----------------------------|-----------------------|--------------|
|      |          |                                                      |                                                               |                                                                                       | Antimicrobial Activity | Anti-diabetic activity | Anti-hemolysis activity | Anti-inflammatory activity | Anti-obesity activity | Cytotoxicity |
| 5.60 | 271.1440 | Clavicipitic acid                                    | C <sub>16</sub> H <sub>18</sub> N <sub>2</sub> O <sub>2</sub> | 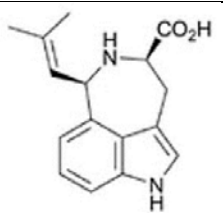   | [1]                    | -                      | -                       | -                          | -                     | [2]          |
| 6.24 | 305.1745 | 7-butyl-6,8-dihydroxy-3-pent-11-enylisochromen-1-one | C <sub>18</sub> H <sub>24</sub> O <sub>4</sub>                |     | [3]                    | -                      | -                       | -                          | -                     | [4]          |
| 6.61 | 303.1591 |                                                      |                                                               |                                                                                       | [5]                    | -                      | -                       | [6]                        | -                     | [7]          |
| 6.70 | 211.1444 | Cyclo(L-Leu-L-Pro)                                   | C <sub>11</sub> H <sub>18</sub> N <sub>2</sub> O <sub>2</sub> |   | [5]                    | -                      | -                       | [6]                        | -                     | [7]          |
| 6.80 | 261.1235 | Cyclo(L-Tyr-L-Pro)                                   | C <sub>14</sub> H <sub>16</sub> N <sub>2</sub> O <sub>3</sub> |  | [8]                    | -                      | -                       | [9]                        | -                     | [10]         |
| 6.92 | 197.1286 | Cyclo(L-Pro-L-Val)                                   | C <sub>10</sub> H <sub>16</sub> N <sub>2</sub> O <sub>2</sub> |  | [5]                    | -                      | -                       | [11]                       | -                     | [12]         |

Supplementary Table 1. Continued.

| Rt   | HRESIMS  | Tentative identification                                                | Formula of the molecule                                       | Structure of the molecule                                                             | References             |                        |                         |                            |                       |              |
|------|----------|-------------------------------------------------------------------------|---------------------------------------------------------------|---------------------------------------------------------------------------------------|------------------------|------------------------|-------------------------|----------------------------|-----------------------|--------------|
|      |          |                                                                         |                                                               |                                                                                       | Antimicrobial Activity | Anti-diabetic activity | Anti-hemolysis activity | Anti-inflammatory activity | Anti-obesity activity | Cytotoxicity |
| 7.00 | 317.1384 | 8-Methoxytryptethelone methyl ether                                     | C <sub>18</sub> H <sub>20</sub> O <sub>5</sub>                | 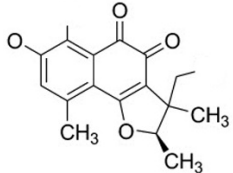   | [13]                   | -                      | -                       | -                          | -                     | [13]         |
| 7.10 | 351.1228 | 7-methoxy-4,8,9-trihydroxy-1,6,7,8-tetrahydro-2H-benzofluoranthen-3-one | C <sub>21</sub> H <sub>18</sub> O <sub>5</sub>                |    | -                      | -                      | -                       | -                          | -                     | [14]         |
| 7.20 | 411.1552 | Brasilamide F                                                           | C <sub>22</sub> H <sub>22</sub> N <sub>2</sub> O <sub>6</sub> |    | [15]                   | -                      | -                       | -                          | -                     | [16]         |
| 7.27 | 273.1455 | Cordiachrome D                                                          | C <sub>17</sub> H <sub>20</sub> O <sub>3</sub>                |  | [17]                   | -                      | -                       | -                          | -                     | [18]         |
| 7.37 | 329.2324 | Sch-725674                                                              | C <sub>18</sub> H <sub>32</sub> O <sub>5</sub>                |  | [19]                   | -                      | -                       | -                          | -                     | -            |

Supplementary Table 1. Continued.

| Rt   | HRESIMS  | Tentative identification              | Formula of the molecule                                       | Structure of the molecule                                                            | References             |                        |                         |                            |                       |              |
|------|----------|---------------------------------------|---------------------------------------------------------------|--------------------------------------------------------------------------------------|------------------------|------------------------|-------------------------|----------------------------|-----------------------|--------------|
|      |          |                                       |                                                               |                                                                                      | Antimicrobial Activity | Anti-diabetic activity | Anti-hemolysis activity | Anti-inflammatory activity | Anti-obesity activity | Cytotoxicity |
| 7.47 | 312.1232 | Carbonarin E                          | C <sub>18</sub> H <sub>17</sub> NO <sub>4</sub>               | 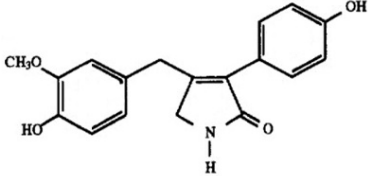   | [20]                   | -                      | -                       | -                          | -                     | [20]         |
| 7.59 | 463.2693 | Virescenoside E                       | C <sub>26</sub> H <sub>38</sub> O <sub>7</sub>                |  | -                      | -                      | [21]                    | -                          | -                     | [21]         |
| 7.72 | 452.2792 | Cytochalasin J                        | C <sub>28</sub> H <sub>37</sub> NO <sub>4</sub>               |  | [22]                   | [23]                   | [24]                    | [24]                       | -                     | [25, 26]     |
| 7.41 | 257.1494 | 2-Methylenecycloheptene-1,3-diglycine | C <sub>12</sub> H <sub>20</sub> N <sub>2</sub> O <sub>4</sub> | -                                                                                    | -                      | -                      | -                       | -                          | -                     | -            |

Supplementary Table 1. Continued.

| Rt   | HRESIMS  | Tentative identification                                                  | Formula of the molecule                                       | Structure of the molecule                                                           | References             |                        |                         |                            |                       |              |
|------|----------|---------------------------------------------------------------------------|---------------------------------------------------------------|-------------------------------------------------------------------------------------|------------------------|------------------------|-------------------------|----------------------------|-----------------------|--------------|
|      |          |                                                                           |                                                               |                                                                                     | Antimicrobial Activity | Anti-diabetic activity | Anti-hemolysis activity | Anti-inflammatory activity | Anti-obesity activity | Cytotoxicity |
| 7.79 | 423.2745 | $\beta$ -Hydroxy Mevinolin                                                | C <sub>24</sub> H <sub>38</sub> O <sub>6</sub>                | 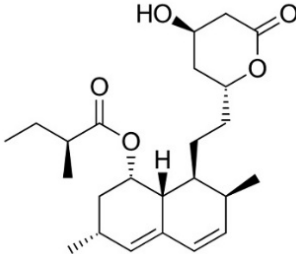  | [27]                   | -                      | -                       | -                          | [28]                  | [29]         |
| 7.88 | 421.2587 | $\gamma$ -Hydroxy Mevinolin                                               |                                                               |                                                                                     |                        |                        |                         |                            |                       |              |
| 7.97 | 325.1547 | Cyclo(Phenylalanyl-N-methyltyrosyl)                                       | C <sub>19</sub> H <sub>20</sub> N <sub>2</sub> O <sub>3</sub> |   | [30]                   | -                      | -                       | -                          | -                     | -            |
| 8.09 | 412.3575 | 14-Aza-24-methylene-D-homocholesta-8,14-dien-3-ol                         | C <sub>28</sub> H <sub>45</sub> NO                            |  | [31]                   | -                      | -                       | -                          | -                     | -            |
| 8.18 | 440.3885 | 4,4-Dimethyl-3-hydroxy-24-methylene-14a-aza-D-homo-5a-cholesta-8,14-diene | C <sub>30</sub> H <sub>49</sub> NO                            | -                                                                                   | -                      | -                      | -                       | -                          | -                     | -            |
| 8.30 | 454.3678 | Acetoxy-24-methylene-14a-aza-n-homo-5a-cholesta-8,14-diene                | C <sub>30</sub> H <sub>47</sub> NO <sub>2</sub>               | -                                                                                   | [32]                   | -                      | -                       | -                          | -                     | -            |

Supplementary Table 1. Continued.

| Rt   | HRESIMS  | Tentative identification                                    | Formula of the molecule            | Structure of the molecule | References             |                        |                         |                            |                       |              |
|------|----------|-------------------------------------------------------------|------------------------------------|---------------------------|------------------------|------------------------|-------------------------|----------------------------|-----------------------|--------------|
|      |          |                                                             |                                    |                           | Antimicrobial Activity | Anti-diabetic activity | Anti-hemolysis activity | Anti-inflammatory activity | Anti-obesity activity | Cytotoxicity |
| 8.63 | 410.3416 | 3-Keto-24-methylene-14a-aza-D-homo-5a-cholesta-8, 14-diene  | C <sub>28</sub> H <sub>43</sub> NO | -                         | [33]                   | -                      | -                       | -                          | -                     | -            |
| 8.89 | 426.3732 | 4a-Methyl-15-aza-24-methylene-D-homocholesta-8,14-dien-3-ol | C <sub>29</sub> H <sub>47</sub> NO | -                         | [34]                   | -                      | -                       | -                          | -                     | -            |

**Supplementary Table 2.** LC-MS analysis of *Penicillium citrinum* extracts.

| Rt    | HRESIMS  | Tentative identification     | Formula of the molecule                                       | Structure of the molecule                                                            | References             |                        |                         |                            |                       |              |
|-------|----------|------------------------------|---------------------------------------------------------------|--------------------------------------------------------------------------------------|------------------------|------------------------|-------------------------|----------------------------|-----------------------|--------------|
|       |          |                              |                                                               |                                                                                      | Antimicrobial Activity | Anti-diabetic activity | Anti-hemolysis activity | Anti-inflammatory activity | Anti-obesity activity | Cytotoxicity |
| 7.80  | 158.1177 | 1,2-Dihydroxyindolizidine    | C <sub>8</sub> H <sub>15</sub> NO <sub>2</sub>                | 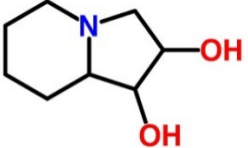  | [35]                   | -                      | -                       | -                          | -                     | -            |
| 9.11  | 137.1075 | 2-Isopropyl-6-methylpyrazine | C <sub>8</sub> H <sub>12</sub> N <sub>2</sub>                 |   | -                      | -                      | -                       | [36]                       | -                     | -            |
| 9.37  | 197.1285 | Cyclo-(L-Pro-L-Val)          | C <sub>10</sub> H <sub>16</sub> N <sub>2</sub> O <sub>2</sub> |   | [5]                    | -                      | -                       | [11]                       | -                     | [12]         |
| 10.75 | 185.1286 | Cyclo(L-Ala-L-Leu)           | C <sub>9</sub> H <sub>16</sub> N <sub>2</sub> O <sub>2</sub>  |   | -                      | -                      | -                       | -                          | -                     | -            |
| 12.11 | 261.1235 | Cyclo(L-Tyr-L-Pro)           | C <sub>14</sub> H <sub>16</sub> N <sub>2</sub> O <sub>3</sub> |  | [8]                    | -                      | -                       | [9]                        | -                     | [10]         |

Supplementary Table 2. Continued.

| Rt    | HRESIMS  | Tentative identification | Formula of the molecule                                       | Structure of the molecule | References             |                        |                         |                            |                       |              |
|-------|----------|--------------------------|---------------------------------------------------------------|---------------------------|------------------------|------------------------|-------------------------|----------------------------|-----------------------|--------------|
|       |          |                          |                                                               |                           | Antimicrobial Activity | Anti-diabetic activity | Anti-hemolysis activity | Anti-inflammatory activity | Anti-obesity activity | Cytotoxicity |
| 12.64 | 211.1440 | Cyclo(L-Leu-L-Pro)       | C <sub>11</sub> H <sub>18</sub> N <sub>2</sub> O <sub>2</sub> |                           | [37]                   | -                      | -                       | [6]                        | -                     | [7]          |
| 13.64 | 245.1283 | Cyclo(L-Phe-L-Pro)       | C <sub>14</sub> H <sub>16</sub> N <sub>2</sub> O <sub>2</sub> |                           | [38]                   | -                      | -                       | -                          | -                     | -            |
| 14.88 | 243.0875 | Lumichrome               | C <sub>12</sub> H <sub>10</sub> N <sub>4</sub> O <sub>2</sub> |                           | [39]                   | -                      | -                       | -                          | -                     | -            |
| 15.04 | 247.1438 | Cyclo(L-Val-L-Phe)       | C <sub>14</sub> H <sub>18</sub> N <sub>2</sub> O <sub>2</sub> |                           | [40]                   | -                      | -                       | -                          | -                     | -            |
| 15.74 | 227.1754 | L-Leucine anhydride      | C <sub>12</sub> H <sub>22</sub> N <sub>2</sub> O <sub>2</sub> | -                         | -                      | -                      | -                       | -                          | -                     | -            |
| 17.43 | 309.0868 | Chaetominedione          | C <sub>17</sub> H <sub>12</sub> N <sub>2</sub> O <sub>4</sub> |                           | [41]                   | -                      | -                       | -                          | -                     | [42]         |

Supplementary Table 2. Continued.

| Rt    | HRESIMS  | Tentative identification | Formula of the molecule                                       | Structure of the molecule                                                           | References             |                        |                         |                            |                       |              |
|-------|----------|--------------------------|---------------------------------------------------------------|-------------------------------------------------------------------------------------|------------------------|------------------------|-------------------------|----------------------------|-----------------------|--------------|
|       |          |                          |                                                               |                                                                                     | Antimicrobial Activity | Anti-diabetic activity | Anti-hemolysis activity | Anti-inflammatory activity | Anti-obesity activity | Cytotoxicity |
| 18.73 | 391.2840 | Merulinic acid B         | C <sub>24</sub> H <sub>38</sub> O <sub>4</sub>                | 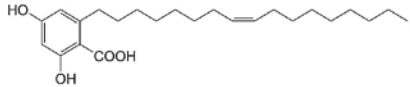  | [43]                   | -                      | -                       | -                          | -                     | -            |
| 19.65 | 430.1608 | Amicycline               | C <sub>21</sub> H <sub>23</sub> N <sub>3</sub> O <sub>7</sub> |   | [44]                   | -                      | -                       | -                          | -                     | -            |
| 21.92 | 251.0912 | Citrinin                 | C <sub>13</sub> H <sub>14</sub> O <sub>5</sub>                |  | [45]                   | -                      | -                       | [46]                       | -                     | [45]         |
| 23.06 | 267.1225 | 5-Hydroxyvertinolide     | C <sub>14</sub> H <sub>18</sub> O <sub>5</sub>                |  | [47]                   | -                      | -                       | [48]                       | -                     | -            |



Supplementary Table 3. GC-MS analysis results of *Penicillium citrinum*.

| Rt    | Tentative identification             | Kovat's Index | Lib Score | Formula of the molecule           | Structure of the molecule                                                             | References             |                        |                         |                            |                       |              |
|-------|--------------------------------------|---------------|-----------|-----------------------------------|---------------------------------------------------------------------------------------|------------------------|------------------------|-------------------------|----------------------------|-----------------------|--------------|
|       |                                      |               |           |                                   |                                                                                       | Antimicrobial Activity | Anti-diabetic activity | Anti-hemolysis activity | Anti-inflammatory activity | Anti-obesity activity | Cytotoxicity |
| 3.432 | $\alpha$ -pinene                     | 940           | 90.5      | C <sub>10</sub> H <sub>16</sub>   | 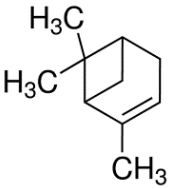   | [49]                   | -                      | -                       | [50]                       | [51]                  | -            |
| 4.576 | Camphene                             | 942           | 86.9      | C <sub>10</sub> H <sub>16</sub>   |    | [52]                   | -                      | -                       | [53]                       | [54]                  | [52]         |
| 4.748 | Trans-4,5-epoxy-carane               | 948           | 95.1      | C <sub>10</sub> H <sub>16</sub> O |   | -                      | -                      | -                       | -                          | -                     | -            |
| 5.515 | Isopropylidene cyclohexane           | 955           | 85.9      | C <sub>9</sub> H <sub>16</sub>    |  | -                      | -                      | -                       | -                          | -                     | -            |
| 6.102 | 3-Isopropenyl-5-methyl-1-cyclohexene | 990           | 92.1      | C <sub>10</sub> H <sub>16</sub>   |  | -                      | -                      | -                       | -                          | -                     | -            |

Supplementary Table 3. Continued.

| Rt    | Tentative identification        | Kovat's Index | Lib Score | Formula of the molecule                       | Structure of the molecule                                                             | References             |                        |                         |                            |                       |              |
|-------|---------------------------------|---------------|-----------|-----------------------------------------------|---------------------------------------------------------------------------------------|------------------------|------------------------|-------------------------|----------------------------|-----------------------|--------------|
|       |                                 |               |           |                                               |                                                                                       | Antimicrobial Activity | Anti-diabetic activity | Anti-hemolysis activity | Anti-inflammatory activity | Anti-obesity activity | Cytotoxicity |
| 6.184 | Isocineole                      | 1001          | 87.9      | C <sub>10</sub> H <sub>18</sub> O             | 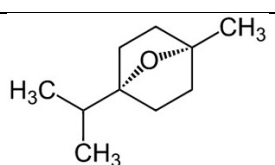   | -                      | -                      | -                       | -                          | -                     | -            |
| 6.373 | 3-isobutyl cyclohexene          | 1013          | 89.5      | C <sub>10</sub> H <sub>18</sub>               |    | -                      | -                      | -                       | -                          | -                     | -            |
| 6.752 | Phenylethanol                   | 1082          | 91.0      | C <sub>8</sub> H <sub>10</sub> O              |    | [55]                   | -                      | -                       | -                          | -                     | -            |
| 6.879 | α-isophorone                    | 1097          | 92.5      | C <sub>9</sub> H <sub>14</sub> O              |   | -                      | -                      | -                       | -                          | -                     | -            |
| 7.123 | Acetylvaleric acid methyl ester | 1120          | 93.2      | C <sub>8</sub> H <sub>14</sub> O <sub>3</sub> |  | -                      | -                      | -                       | -                          | -                     | -            |

Supplementary Table 3. Continued.

| Rt    | Tentative identification    | Kovat's Index | Lib Score | Formula of the molecule                       | Structure of the molecule                                                             | References             |                        |                         |                            |                       |              |
|-------|-----------------------------|---------------|-----------|-----------------------------------------------|---------------------------------------------------------------------------------------|------------------------|------------------------|-------------------------|----------------------------|-----------------------|--------------|
|       |                             |               |           |                                               |                                                                                       | Antimicrobial Activity | Anti-diabetic activity | Anti-hemolysis activity | Anti-inflammatory activity | Anti-obesity activity | Cytotoxicity |
| 7.682 | Methyl 6-oxoheptanoate      | 1124          | 89.2      | C <sub>8</sub> H <sub>14</sub> O <sub>3</sub> | 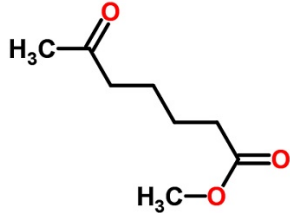   | -                      | -                      | -                       | -                          | -                     | -            |
| 8.296 | Citronellal                 | 1132          | 87.2      | C <sub>10</sub> H <sub>18</sub> O             |    | [56]                   | -                      | -                       | -                          | -                     | -            |
| 8.368 | Isopulegol                  | 1135          | 88.3      | C <sub>10</sub> H <sub>18</sub> O             |   | -                      | -                      | -                       | -                          | -                     | -            |
| 9.587 | cis-p-mentha-2,8-diene-1-ol | 1140          | 88.5      | C <sub>10</sub> H <sub>16</sub> O             |  | -                      | -                      | -                       | -                          | -                     | -            |

Supplementary Table 3. Continued.

| Rt     | Tentative identification            | Kovat's Index | Lib Score | Formula of the molecule                                      | Structure of the molecule                                                             | References             |                        |                         |                            |                       |              |
|--------|-------------------------------------|---------------|-----------|--------------------------------------------------------------|---------------------------------------------------------------------------------------|------------------------|------------------------|-------------------------|----------------------------|-----------------------|--------------|
|        |                                     |               |           |                                                              |                                                                                       | Antimicrobial Activity | Anti-diabetic activity | Anti-hemolysis activity | Anti-inflammatory activity | Anti-obesity activity | Cytotoxicity |
| 10.006 | 1,2,3,4-tetrahydronaphthalene       | 1142          | 91.2      | C <sub>10</sub> H <sub>12</sub>                              | 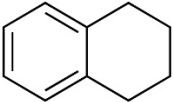   | -                      | -                      | -                       | -                          | -                     | -            |
| 10.581 | (3Z)-3-pentenyl benzene             | 1148          | 86.9      | C <sub>11</sub> H <sub>14</sub>                              |    | -                      | -                      | -                       | -                          | -                     | -            |
| 10.770 | 1-(2,2-dimethylcyclohexyl) ethanone | 1151          | 93.0      | C <sub>10</sub> H <sub>18</sub> O                            |   | -                      | -                      | -                       | -                          | -                     | -            |
| 10.942 | Norleucine                          | 1153          | 90.0      | C <sub>6</sub> H <sub>13</sub> NO <sub>2</sub>               |  | -                      | -                      | -                       | -                          | -                     | -            |
| 12.765 | Arginine                            | 1157          | 92.1      | C <sub>6</sub> H <sub>14</sub> N <sub>4</sub> O <sub>2</sub> |   | -                      | -                      | [57]                    | [58]                       | -                     | -            |

Supplementary Table 3. Continued.

| Rt     | Tentative identification                        | Kovat's Index | Lib Score | Formula of the molecule           | Structure of the molecule                                                             | References             |                        |                         |                            |                       |              |
|--------|-------------------------------------------------|---------------|-----------|-----------------------------------|---------------------------------------------------------------------------------------|------------------------|------------------------|-------------------------|----------------------------|-----------------------|--------------|
|        |                                                 |               |           |                                   |                                                                                       | Antimicrobial Activity | Anti-diabetic activity | Anti-hemolysis activity | Anti-inflammatory activity | Anti-obesity activity | Cytotoxicity |
| 12.901 | 4-isopropyl-1-methyl-7-azabicyclo[4.1.0]heptane | 1159          | 91.6      | C <sub>10</sub> H <sub>19</sub> N | 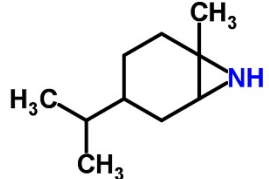   | -                      | -                      | -                       | -                          | -                     | -            |
| 13.027 | Terpinen-4-ol                                   | 1161          | 91.5      | C <sub>10</sub> H <sub>18</sub> O |    | [59]                   | -                      | -                       | [60]                       | -                     | -            |
| 13.163 | 1,2,3,6-tetramethylbicyclo[2.2.2]octa-2,5-diene | 1168          | 90.4      | C <sub>12</sub> H <sub>18</sub>   |   | -                      | -                      | -                       | -                          | -                     | -            |
| 13.578 | Dihydrocarvone                                  | 1179          | 89.5      | C <sub>10</sub> H <sub>16</sub> O |  | -                      | -                      | -                       | -                          | -                     | -            |

Supplementary Table 3. Continued.

| Rt     | Tentative identification                      | Kovat's Index | Lib Score | Formula of the molecule                        | Structure of the molecule                                                             | References             |                        |                         |                            |                       |              |
|--------|-----------------------------------------------|---------------|-----------|------------------------------------------------|---------------------------------------------------------------------------------------|------------------------|------------------------|-------------------------|----------------------------|-----------------------|--------------|
|        |                                               |               |           |                                                |                                                                                       | Antimicrobial Activity | Anti-diabetic activity | Anti-hemolysis activity | Anti-inflammatory activity | Anti-obesity activity | Cytotoxicity |
| 14.725 | (2E,3Z)-2-ethylidene-6-methyl-3,5-heptadienal | 1182          | 93.1      | C <sub>10</sub> H <sub>14</sub> O              | 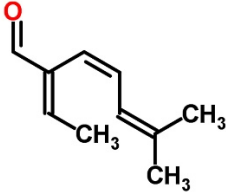   | -                      | -                      | -                       | -                          | -                     | -            |
| 15.293 | N-trimethylsilylaniline                       | 1186          | 88.1      | C <sub>9</sub> H <sub>15</sub> NSi             |    | -                      | -                      | -                       | -                          | -                     | -            |
| 16.955 | 7-nonenic acid methyl ester                   | 1191          | 88.9      | C <sub>10</sub> H <sub>18</sub> O <sub>2</sub> |     | -                      | -                      | -                       | -                          | -                     | -            |
| 17.108 | 3-isopropenyl-2-methylcyclohexanol            | 1197          | 86.6      | C <sub>10</sub> H <sub>18</sub> O              |  | -                      | -                      | -                       | -                          | -                     | -            |
| 17.957 | Trans-p-mentha-1(7),8-dien-2-ol               | 1201          | 91.5      | C <sub>10</sub> H <sub>16</sub> O              |  | -                      | -                      | -                       | -                          | -                     | -            |

Supplementary Table 3. Continued.

| Rt     | Tentative identification                       | Kovat's Index | Lib Score | Formula of the molecule           | Structure of the molecule                                                             | References             |                        |                         |                            |                       |              |
|--------|------------------------------------------------|---------------|-----------|-----------------------------------|---------------------------------------------------------------------------------------|------------------------|------------------------|-------------------------|----------------------------|-----------------------|--------------|
|        |                                                |               |           |                                   |                                                                                       | Antimicrobial Activity | Anti-diabetic activity | Anti-hemolysis activity | Anti-inflammatory activity | Anti-obesity activity | Cytotoxicity |
| 21.586 | 1-methylverbenol                               | 1209          | 85.9      | C <sub>12</sub> H <sub>20</sub> O | 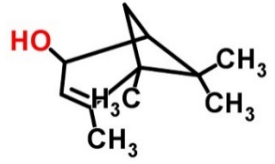   | -                      | -                      | -                       | -                          | -                     | -            |
| 22.372 | Cuminaldehyde                                  | 1214          | 91.9      | C <sub>10</sub> H <sub>12</sub> O |    | [61]                   | -                      | -                       | [61]                       | -                     | [61]         |
| 22.480 | Citronellol epoxide                            | 1220          | 91.5      | C <sub>10</sub> H <sub>20</sub> O |   | -                      | -                      | -                       | -                          | -                     | -            |
| 24.602 | (1E)-1-ethylidene-7a-methyloctahydro-1H-indene | 1239          | 93.1      | C <sub>12</sub> H <sub>20</sub>   |  | -                      | -                      | -                       | -                          | -                     | -            |
| 25.108 | Isocarveol                                     | 1261          | 91.4      | C <sub>10</sub> H <sub>16</sub> O |  | -                      | -                      | -                       | -                          | -                     | -            |

Supplementary Table 3. Continued.

| Rt     | Tentative identification         | Kovat's Index | Lib Score | Formula of the molecule            | Structure of the molecule                                                             | References             |                        |                         |                            |                       |              |
|--------|----------------------------------|---------------|-----------|------------------------------------|---------------------------------------------------------------------------------------|------------------------|------------------------|-------------------------|----------------------------|-----------------------|--------------|
|        |                                  |               |           |                                    |                                                                                       | Antimicrobial Activity | Anti-diabetic activity | Anti-hemolysis activity | Anti-inflammatory activity | Anti-obesity activity | Cytotoxicity |
| 25.451 | 3-methylindanone                 | 1279          | 89.0      | C <sub>10</sub> H <sub>10</sub> O  | 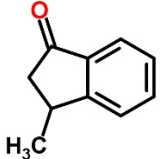   | -                      | -                      | -                       | -                          | -                     | -            |
| 25.803 | n-undecanal                      | 1286          | 90.3      | C <sub>11</sub> H <sub>22</sub> O  |     | -                      | -                      | -                       | -                          | -                     | -            |
| 26.038 | p-dimethylaminacetophenone       | 1291          | 90.5      | C <sub>10</sub> H <sub>13</sub> NO |    | -                      | -                      | -                       | -                          | -                     | -            |
| 27.356 | 2,2,6,6-tetramethyl-4-piperidone | 1306          | 92.1      | C <sub>9</sub> H <sub>17</sub> NO  |  | -                      | -                      | -                       | -                          | -                     | -            |
| 28.071 | E-megastigma-4,6,8-triene        | 1317          | 87.9      | C <sub>13</sub> H <sub>20</sub>    |  | -                      | -                      | -                       | -                          | -                     | -            |



Supplementary Table 3. Continued.

| Rt     | Tentative identification             | Kovat's Index | Lib Score | Formula of the molecule                       | Structure of the molecule                                                            | References             |                        |                         |                            |                       |              |
|--------|--------------------------------------|---------------|-----------|-----------------------------------------------|--------------------------------------------------------------------------------------|------------------------|------------------------|-------------------------|----------------------------|-----------------------|--------------|
|        |                                      |               |           |                                               |                                                                                      | Antimicrobial Activity | Anti-diabetic activity | Anti-hemolysis activity | Anti-inflammatory activity | Anti-obesity activity | Cytotoxicity |
| 31.220 | 4,8-dimethyl-3,7-nonadien-2-ol       | 1329          | 86.5      | C <sub>11</sub> H <sub>20</sub> O             | 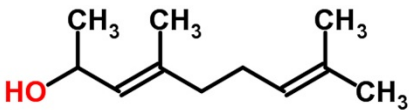   | -                      | -                      | -                       | -                          | -                     | -            |
| 31.807 | Decahydro-4a-methyl-1-naphthalenol   | 1363          | 90.5      | C <sub>15</sub> H <sub>26</sub> O             |   | -                      | -                      | -                       | -                          | -                     | -            |
| 32.836 | 9-oxabicyclo[3.3.1]nonane-2,6-diol   | 1347          | 86.9      | C <sub>8</sub> H <sub>14</sub> O <sub>3</sub> |   | -                      | -                      | -                       | -                          | -                     | -            |
| 33.721 | Octahydro-1-methyl-4(1H)-quinolinone | 1386          | 91.5      | C <sub>10</sub> H <sub>17</sub> NO            |  | -                      | -                      | -                       | -                          | -                     | -            |

Supplementary Table 4. GC-MS analysis results of *Geotrichum candidum*.

| Rt     | Tentative identification         | Kovat's Index | Lib Score | Formula of the molecule                        | Structure of the molecule                                                             | References             |                        |                         |                            |                       |              |
|--------|----------------------------------|---------------|-----------|------------------------------------------------|---------------------------------------------------------------------------------------|------------------------|------------------------|-------------------------|----------------------------|-----------------------|--------------|
|        |                                  |               |           |                                                |                                                                                       | Antimicrobial Activity | Anti-diabetic activity | Anti-hemolysis activity | Anti-inflammatory activity | Anti-obesity activity | Cytotoxicity |
| 6.175  | 1,4-dimethylpiperidine           | 820           | 87.6      | C <sub>7</sub> H <sub>15</sub> N               | 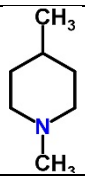   | -                      | -                      | -                       | -                          | -                     | -            |
| 6.743  | Isocineole                       | 1001          | 89.2      | C <sub>10</sub> H <sub>18</sub> O              |    | -                      | -                      | -                       | -                          | -                     | -            |
| 7.141  | p-cymene                         | 1011          | 90.6      | C <sub>10</sub> H <sub>14</sub>                |   | -                      | -                      | -                       | -                          | -                     | -            |
| 16.675 | cis-4-octenoic acid methyl ester | 1092          | 91.5      | C <sub>9</sub> H <sub>16</sub> O <sub>2</sub>  |  | -                      | -                      | -                       | -                          | -                     | -            |
| 21.568 | Trans-pulegone oxide             | 1230          | 90.2      | C <sub>10</sub> H <sub>16</sub> O <sub>2</sub> |  | -                      | -                      | -                       | -                          | -                     | -            |

Supplementary Table 4. Continued.

| Rt     | Tentative identification   | Kovat's Index | Lib Score | Formula of the molecule                        | Structure of the molecule                                                             | References             |                        |                         |                            |                       |              |
|--------|----------------------------|---------------|-----------|------------------------------------------------|---------------------------------------------------------------------------------------|------------------------|------------------------|-------------------------|----------------------------|-----------------------|--------------|
|        |                            |               |           |                                                |                                                                                       | Antimicrobial Activity | Anti-diabetic activity | Anti-hemolysis activity | Anti-inflammatory activity | Anti-obesity activity | Cytotoxicity |
| 22.498 | Piperitone oxide           | 1237          | 94.1      | C <sub>10</sub> H <sub>16</sub> O <sub>2</sub> | 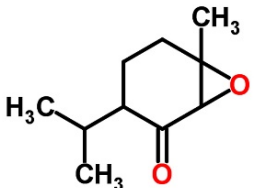   | -                      | -                      | -                       | -                          | -                     | -            |
| 23.464 | Ascaridole                 | 1290          | 90.6      | C <sub>10</sub> H <sub>16</sub> O <sub>2</sub> |    | -                      | -                      | -                       | -                          | -                     | [62]         |
| 25.449 | 2(E)-undecenal             | 1341          | 91.9      | C <sub>11</sub> H <sub>20</sub> O              |     | -                      | -                      | -                       | -                          | -                     | -            |
| 25.799 | 8-methylocta hydrocoumarin | 1388          | 87.4      | C <sub>10</sub> H <sub>16</sub> O <sub>2</sub> |  | -                      | -                      | -                       | -                          | -                     | -            |
| 27.419 | Iridomyrmecin              | 1400          | 88.5      | C <sub>10</sub> H <sub>16</sub> O <sub>2</sub> |  | -                      | -                      | -                       | -                          | -                     | -            |

Supplementary Table 4. Continued.

| Rt     | Tentative identification                   | Kovat's Index | Lib Score | Formula of the molecule                        | Structure of the molecule                                                             | References             |                        |                         |                            |                       |              |
|--------|--------------------------------------------|---------------|-----------|------------------------------------------------|---------------------------------------------------------------------------------------|------------------------|------------------------|-------------------------|----------------------------|-----------------------|--------------|
|        |                                            |               |           |                                                |                                                                                       | Antimicrobial Activity | Anti-diabetic activity | Anti-hemolysis activity | Anti-inflammatory activity | Anti-obesity activity | Cytotoxicity |
| 28.954 | 1-isopropenyl-2,3,4,5-tetramethyl benzene  | 1412          | 90.1      | C <sub>13</sub> H <sub>18</sub>                | 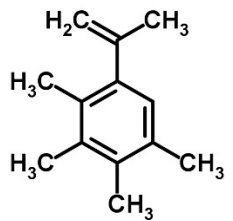   | -                      | -                      | -                       | -                          | -                     | -            |
| 29.071 | 2,3-dihydro-3-methyl-3-benzofuran methanol | 1414          | 85.1      | C <sub>10</sub> H <sub>12</sub> O <sub>2</sub> |    | -                      | -                      | -                       | -                          | -                     | -            |
| 29.180 | 2-methyl-1,2,3,4-tetrahydro-1-naphthalenol | 1418          | 88.1      | C <sub>11</sub> H <sub>14</sub> O              |   | -                      | -                      | -                       | -                          | -                     | -            |
| 29.550 | Capramide                                  | 1425          | 86.8      | C <sub>10</sub> H <sub>21</sub> NO             |   | -                      | -                      | -                       | -                          | -                     | -            |
| 31.067 | 3-(hydroxymethyl)-5-methoxyphenol          | 1446          | 88.9      | C <sub>8</sub> H <sub>10</sub> O <sub>3</sub>  |  | -                      | -                      | -                       | -                          | -                     | -            |

Supplementary Table 4. Continued.

| Rt     | Tentative identification      | Kovat's Index | Lib Score | Formula of the molecule                                       | Structure of the molecule                                                             | References             |                        |                         |                            |                       |              |
|--------|-------------------------------|---------------|-----------|---------------------------------------------------------------|---------------------------------------------------------------------------------------|------------------------|------------------------|-------------------------|----------------------------|-----------------------|--------------|
|        |                               |               |           |                                                               |                                                                                       | Antimicrobial Activity | Anti-diabetic activity | Anti-hemolysis activity | Anti-inflammatory activity | Anti-obesity activity | Cytotoxicity |
| 32.457 | 2',5'-dimethyl crotonophenone | 1462          | 86.6      | C <sub>12</sub> H <sub>14</sub> O                             | 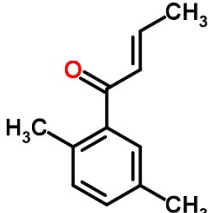   | -                      | -                      | -                       | -                          | -                     | -            |
| 33.685 | 2,5,8-trimethyltetralin       | 1471          | 91.5      | C <sub>13</sub> H <sub>18</sub>                               |    | -                      | -                      | -                       | -                          | -                     | -            |
| 33.929 | Dimethylmuconic acid          | 1499          | 85.7      | C <sub>8</sub> H <sub>10</sub> O <sub>4</sub>                 |   | -                      | -                      | -                       | -                          | -                     | -            |
| 35.265 | Cyclo(Gly-Pro)                | 1795          | 91.3      | C <sub>7</sub> H <sub>10</sub> N <sub>2</sub> O <sub>2</sub>  |  | -                      | -                      | -                       | [63]                       | -                     | -            |
| 35.346 | Cyclo(Leu-Pro)                | 1896          | 86.7      | C <sub>11</sub> H <sub>18</sub> N <sub>2</sub> O <sub>2</sub> |  | [5]                    | -                      | -                       | [6]                        | -                     | [7]          |

Supplementary Table 4. Continued.

| Rt     | Tentative identification     | Kovat's Index | Lib Score | Formula of the molecule                                       | Structure of the molecule                                                            | References             |                        |                         |                            |                       |              |
|--------|------------------------------|---------------|-----------|---------------------------------------------------------------|--------------------------------------------------------------------------------------|------------------------|------------------------|-------------------------|----------------------------|-----------------------|--------------|
|        |                              |               |           |                                                               |                                                                                      | Antimicrobial Activity | Anti-diabetic activity | Anti-hemolysis activity | Anti-inflammatory activity | Anti-obesity activity | Cytotoxicity |
| 36.475 | Geranyl- $\alpha$ -terpinene | 1968          | 88.7      | C <sub>20</sub> H <sub>32</sub>                               | 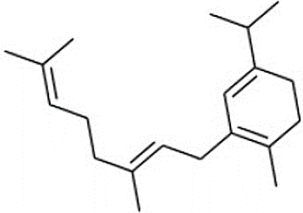  | -                      | -                      | -                       | -                          | -                     | -            |
| 36.800 | $\beta$ -carboline           | 2009          | 93.0      | C <sub>11</sub> H <sub>8</sub> N <sub>2</sub>                 |   | [64]                   | -                      | [64]                    | -                          | -                     | [64]         |
| 37.080 | Cyclo(Phe-Pro)               | 2138          | 93.7      | C <sub>14</sub> H <sub>16</sub> N <sub>2</sub> O <sub>2</sub> |  | [38]                   | -                      | -                       | -                          | -                     | -            |

**Supplementary Table 5.** Genome mining of secondary metabolites of *Geotrichum candidum* and *Penicillium citrinum* isolates.

| <i>Penicillium citrinum</i> isolate DSM 1997 |            |        |                                                                      |                                                                                      |
|----------------------------------------------|------------|--------|----------------------------------------------------------------------|--------------------------------------------------------------------------------------|
| Cluster                                      | Type       | Size   | Compound                                                             | Structure                                                                            |
| 1                                            | T1pks      | 28,792 | -                                                                    | -                                                                                    |
| 2                                            | Nrps       | 18,748 | -                                                                    | 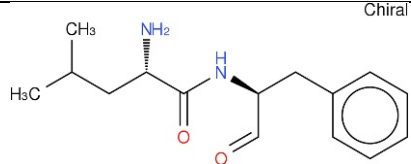  |
| 3                                            | Other      | 42,474 | -                                                                    | -                                                                                    |
| 4                                            | Nrps       | 44,262 | -                                                                    | -                                                                                    |
| 5                                            | Other      | 36,943 | -                                                                    | -                                                                                    |
| 6                                            | T1pks      | 50,806 | Equisetin biosynthetic gene cluster (18% of genes show similarity)   | -                                                                                    |
| 7                                            | T1pks      | 59,370 | Sorbicillin biosynthetic gene cluster (42% of genes show similarity) |   |
| 8                                            | T1pks      | 28,328 | -                                                                    | -                                                                                    |
| 9                                            | T1pks-Nrps | 51,926 | -                                                                    |   |
| 10                                           | Nrps       | 41,023 | -                                                                    |  |
| 11                                           | Other      | 39,102 | -                                                                    | -                                                                                    |
| 12                                           | Other      | 37,864 | -                                                                    | -                                                                                    |
| 13                                           | Terpene    | 21,274 | -                                                                    | -                                                                                    |
| 14                                           | Other      | 25,232 | -                                                                    | -                                                                                    |
| 15                                           | Other      | 34,917 | -                                                                    | -                                                                                    |
| 16                                           | T1pks      | 22,145 | -                                                                    | -                                                                                    |

Supplementary Table 5. Continued.

| <i>Penicillium citrinum</i> isolate DSM 1997 |                |        |                                                                      |                                                                                     |
|----------------------------------------------|----------------|--------|----------------------------------------------------------------------|-------------------------------------------------------------------------------------|
| Cluster                                      | Type           | Size   | Compound                                                             | Structure                                                                           |
| 17                                           | T1pks          | 47,260 | Citrinin biosynthetic gene cluster (31% of genes show similarity)    | -                                                                                   |
| 18                                           | Nrps           | 46,339 | -                                                                    | -                                                                                   |
| 19                                           | Nrps           | 85,967 | -                                                                    | 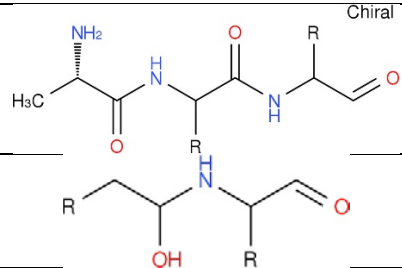 |
| 20                                           | T1pks-<br>Nrps | 43,638 | -                                                                    |  |
| 21                                           | Other          | 38,012 | -                                                                    | -                                                                                   |
| 22                                           | Other          | 27,978 | -                                                                    | -                                                                                   |
| 23                                           | T1pks          | 46,584 | -                                                                    | -                                                                                   |
| 24                                           | Other          | 45,568 | -                                                                    | -                                                                                   |
| 25                                           | T1pks          | 33,688 | Emericellin biosynthetic gene cluster (28% of genes show similarity) | -                                                                                   |
| 26                                           | T1pks          | 32,044 | -                                                                    | -                                                                                   |
| 27                                           | Indole         | 42,758 | -                                                                    | -                                                                                   |
| 28                                           | T1pks          | 48,262 | -                                                                    | -                                                                                   |
| 29                                           | T1pks          | 34,925 | -                                                                    | -                                                                                   |



Supplementary Table 5. Continued.

| <i>Penicillium citrinum</i> isolate JCM 22607 |         |        |                                                                      |                                                                                     |
|-----------------------------------------------|---------|--------|----------------------------------------------------------------------|-------------------------------------------------------------------------------------|
| Cluster                                       | Type    | Size   | Compound                                                             | Structure                                                                           |
| 1                                             | T1pks   | 45,584 | Emericellin biosynthetic gene cluster (28% of genes show similarity) | -                                                                                   |
| 2                                             | T1pks   | 46,811 | -                                                                    | -                                                                                   |
| 3                                             | T1pks   | 48,261 | -                                                                    | -                                                                                   |
| 4                                             | Nrps    | 58,642 | -                                                                    | 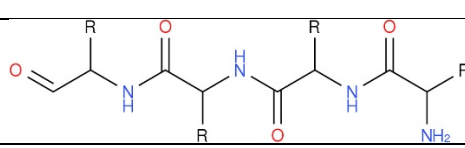 |
| 5                                             | T1pks   | 57,346 | Sorbicillin biosynthetic gene cluster (57% of genes show similarity) | -                                                                                   |
| 6                                             | T1pks   | 44,579 | -                                                                    | -                                                                                   |
| 7                                             | Nrps    | 45,914 | -                                                                    | -                                                                                   |
| 8                                             | Terpene | 21,274 | -                                                                    | -                                                                                   |
| 9                                             | Other   | 44,893 | -                                                                    | -                                                                                   |

Supplementary Table 5. Continued.

| <i>Penicillium citrinum</i> Core Genome |            |        |                                                                      |                                                                                                   |
|-----------------------------------------|------------|--------|----------------------------------------------------------------------|---------------------------------------------------------------------------------------------------|
| Cluster                                 | Type       | Size   | Compound                                                             | Structure                                                                                         |
| 1                                       | T1pks      | 28,792 | -                                                                    | -                                                                                                 |
| 2                                       | Nrps       | 18,748 | -                                                                    | 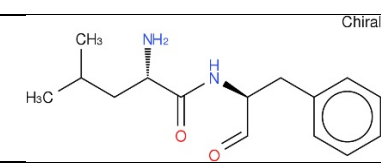 <p>Chiral</p> |
| 3                                       | Other      | 42,474 | -                                                                    | -                                                                                                 |
| 4                                       | Nrps       | 44,262 | -                                                                    | -                                                                                                 |
| 5                                       | Other      | 36,943 | -                                                                    | -                                                                                                 |
| 6                                       | T1pks      | 50,806 | Equisetin biosynthetic gene cluster (18% of genes show similarity)   | -                                                                                                 |
| 7                                       | T1pks      | 59,370 | Sorbicillin biosynthetic gene cluster (42% of genes show similarity) |                |
| 8                                       | T1pks      | 28,327 | -                                                                    | -                                                                                                 |
| 9                                       | T1pks-Nrps | 39,576 | -                                                                    |                |
| 10                                      | Nrps       | 41,023 | -                                                                    |               |
| 11                                      | Other      | 39,102 | -                                                                    | -                                                                                                 |
| 12                                      | Other      | 37,517 | -                                                                    | -                                                                                                 |
| 13                                      | Terpene    | 21,274 | -                                                                    | -                                                                                                 |
| 14                                      | Other      | 25,232 | -                                                                    | -                                                                                                 |
| 15                                      | Other      | 29,211 | -                                                                    | -                                                                                                 |
| 16                                      | T1pks      | 22,135 | -                                                                    | -                                                                                                 |

Supplementary Table 5. Continued.

| <i>Penicillium citrinum</i> Core Genome                        |            |        |                                                                      |           |
|----------------------------------------------------------------|------------|--------|----------------------------------------------------------------------|-----------|
| Cluster                                                        | Type       | Size   | Compound                                                             | Structure |
| 17                                                             | T1pks      | 47,260 | Citrinin biosynthetic gene cluster (31% of genes show similarity)    | -         |
| 18                                                             | Nrps       | 46,339 | -                                                                    | -         |
| 19                                                             | Nrps       | 85,967 | -                                                                    |           |
| 20                                                             | T1pks-Nrps | 43,638 | -                                                                    |           |
| 21                                                             | Other      | 38,012 | -                                                                    | -         |
| 22                                                             | Other      | 27,978 | -                                                                    | -         |
| 23                                                             | T1pks      | 46,584 | -                                                                    | -         |
| 24                                                             | Other      | 45,568 | -                                                                    | -         |
| 25                                                             | T1pks      | 33,688 | Emericellin biosynthetic gene cluster (28% of genes show similarity) | -         |
| 26                                                             | T1pks      | 32,043 | -                                                                    | -         |
| 27                                                             | Indole     | 19,754 | -                                                                    | -         |
| 28                                                             | T1pks      | 48,262 | -                                                                    | -         |
| <i>Penicillium citrinum</i> isolate DSM 1997 Accessory genome  |            |        |                                                                      |           |
| 1                                                              | T1pks      | 18,735 | -                                                                    | -         |
| <i>Penicillium citrinum</i> isolate JCM 22607 Accessory genome |            |        |                                                                      |           |
| -                                                              | -          | -      | -                                                                    | -         |

## References

1. Bittner, S.; Scherzer, R.; Harlev, E. The five bromotryptophans. *Amino Acids* **2007**, *33*, 19-42. DOI: [10.1007/s00726-006-0441-8](https://doi.org/10.1007/s00726-006-0441-8).
2. Liu, H.; Jia, Y. (2017). Ergot alkaloids: synthetic approaches to lysergic acid and clavinet alkaloids. *Nat. Prod. Rep* **2017**, *34*, 411-432. DOI: [10.1039/C6NP00110F](https://doi.org/10.1039/C6NP00110F).
3. Kongsaree, P.; Prabpai, S.; Sriubolmas, N.; Vongvein, C.; Wiyakrutta, S. Antimalarial dihydroisocoumarins produced by *Geotrichum* sp., an endophytic fungus of *Crassocephalum crepidioides*. *J. Nat. Prod* **2003**, *66*, 709-711.
4. Saeed, A.; Rafique, H.; Arshad, M. Total synthesis and antibacterial screening of ( $\pm$ )-7-butyl-6,8-dihydroxy-3-pentyl-3,4-dihydroisochromen-1-one. *J. Asian Nat. Prod. Res* **2013**, DOI: [10.1080/10286020.2013.817993](https://doi.org/10.1080/10286020.2013.817993).
5. Kumar, S.N.; Nath, V.S.; Chandran, R.P.; Nambisan, B. Cyclic dipeptides from rhabditid entomopathogenic nematode-associated *Bacillus cereus* have antimicrobial activities. *World J. Microbiol. Biotechnol* **2014**, *30*, 439-449. DOI: [10.1007/s11274-013-1461-7](https://doi.org/10.1007/s11274-013-1461-7).
6. Lee, M-S.; Wang, S-W.; Wang, G-J.; Pang, K-L.; Lee, C-K.; Kuo, Y-H.; Cha, H-J.; Lin, R-K.; Lee, T-H. (2016). Angiogenesis inhibitors and anti-inflammatory agents from *Phoma* sp. NTOU4195. *J. Nat. Prod* **2016**, *79*, 2983-2990. DOI: [10.1021/acs.jnatprod.6b00407](https://doi.org/10.1021/acs.jnatprod.6b00407).
7. Mangamuri, U.K.; Muvva, V.; Poda, S.; Manavathi, B.; Bhujangarao, C.; Yenamandra, V. Chemical characterization and bioactivity of diketopiperazine derivatives from the mangrove derived *Pseudonocardia endophytica*. *Egypt. J. Aquat. Res* **2016**, *42*, 169-175.
8. Wattana-Amorn, P.; Charoenwongsa, W.; Williams, C.; Crump, M.P.; Apichaisataienchote, B. Antibacterial activity of cyclo(L-Pro-L-Tyr) and cyclo(D-Pro-L-Tyr) from *Streptomyces* sp. Strain 22-4 against phytopathogenic bacteria. *Nat. Prod. Res.* **2016**, *30*, 1980-1983. DOI: [10.1080/14786419.2015.1095747](https://doi.org/10.1080/14786419.2015.1095747).
9. Yang, M-L.; Kuo, P-C.; Hwang, T-L.; Wu, T-S. Anti-inflammatory Principles from *Cordyceps sinensis*. *J. Nat. Prod* **2011**, *74*, 1996-2000. DOI: [10.1021/np100902f](https://doi.org/10.1021/np100902f).
10. Capon, R.J.; Stewart, M.; Ratnayake, R.; Lacey, E.; Gill, J.H. Citromycetins and bilains A-C: new aromatic polyketides and diketopiperazines from Australian marine-derived and terrestrial *Penicillium* spp. *J. Nat. Prod* **2007**, *70*, 1746-52. DOI: [10.1021/np0702483](https://doi.org/10.1021/np0702483).
11. Gao, Y.; Liu, Q.; Liu, B.; Xie, C-L.; Cao, M-J.; Yang, X-W.; Liu, G-M. Inhibitory activities of compounds from the marine actinomycete *Williamsia* sp. MCCC 1A11233 variant on IgE-mediated mast cells and passive cutaneous anaphylaxis. *J. Agric. Food Chem* **2017**, *65*, 10749-10756. DOI: [10.1021/acs.jafc.7b04314](https://doi.org/10.1021/acs.jafc.7b04314).
12. Vazquez-Rivera, D.; Gonzalez, O.; Guzman-Rodriguez, J.; Diaz-Perez, A.L.; Ochoa-Zarzosa, A.; Lopez-Bucio, J.; Meza-Carmen, V.; Jesus Campos-Garcia, J. Cytotoxicity of cyclodipeptides from *Pseudomonas aeruginosa* PAO1 leads to apoptosis in human cancer cell lines. *BioMed Res. Int* **2015**, 197608. DOI: [10.1155/2015/197608](https://doi.org/10.1155/2015/197608).
13. Elsebai, M.F.; Saleem, M.; Tejesvi, M.V.; Kajula, M.; Mattila, S.; Mehiri, M.; Turpeinen, A.; Pirttila, M. Fungal phenalenones: chemistry, biology, biosynthesis and phylogeny. *Nat. Prod. Rep* **2014**, *31*, 628. DOI: [10.1039/c3np70088g](https://doi.org/10.1039/c3np70088g).
14. Wrigley, S.K.; Ainsworth, A.M.; Kau, D.A.; Martin, S.M.; Bahl, S.; Tang, J.S.; Hardick, D.J.; Rawlins, P.; Sadheghi, R.; Moore, M. Novel reduced benzo[j]fluranthen-3-ones from *Cladosporium* cf. *cladosporioides* with cytokine production and tyrosine kinase inhibitory properties. *J. Antibiot (Tokyo)* **2011**, *54*, 479-88.
15. Fill, T.P.; dos Santos, R.M.G.; Barissonc, A.; Rodrigues-Filho, E.; Souza, A.Q.L. Co-production of bisphenylpropanoid amides and meroterpenes by an endophytic *Penicillium brasilianum* found in the root bark of *Melia azedarach*. *Z. Naturforsch* **2009**, *64 c*, 355-360.

16. Guo, Z.; Ren, F.; Che, Y.; Gang Liu, G.; Liu, L. New bergamotane sesquiterpenoids from the plant endophytic fungus *Paraconiothyrium brasiliense*. *Molecules* **2015**, *20*, 14611-14620. DOI: [10.3390/molecules200814611](https://doi.org/10.3390/molecules200814611).
17. Lobermann, F.; Weisheit, L.; Dirk Trauner, D. Intramolecular Vinyl Quinone Diels–Alder Reactions: Asymmetric Entry to the Cordiachrome Core and Synthesis of (–) Isoglaziopianol. *Org. Lett* **2013**, *15*, 4324–4326. DOI: [10.1021/ol401787n](https://doi.org/10.1021/ol401787n).
18. Dettrakul, S.; Surerum, S.; Shuleewan Rajviroongit, S.; Kittakoop, P. Biomimetic transformation and biological activities of globiferin, a terpenoid benzoquinone from *Cordia globifera*. *J. Nat. Prod* **2009**, *72*, 861–865. DOI: [10.1021/np9000703](https://doi.org/10.1021/np9000703).
19. Bodugam, M.; Javed, S.; Ganguly, A.; Torres, J.; Hanson, P.R. A pot-economical approach to the total synthesis of Sch-725674. *Org. Lett* **2016**, *18*, 516–519. DOI: [10.1021/acs.orglett.5b03547](https://doi.org/10.1021/acs.orglett.5b03547).
20. Zhang, Y.; Zhu, T.; Fang, Y.; Liu, H.; Gu, Q.; Zhu, W. Carbonarones A and B, new bioactive g-pyrone and a-pyridone derivatives from the marine-derived fungus *Aspergillus carbonarius*. *J. Antibiot* **2007**, *60*, 153-157.
21. Klykov, A.G.; Moiseenko, L.M.; Chaikinab, E.L.; Afiyatullovb, S.S.; Anisimov, M.M. Productivity and quality of Seeds of *Fagopyrum esculentum* Moench under treatment with virescenosides A and a sum of glycosides of marine Fungus *Acremonium striatisporum* at super low concentrations. *Russian Agr. Sci* **2013**, *39*, 303–306.
22. Betina, V.; Micekova, D.; Nemeč, P. Antimicrobial properties of cytochalasins and their alteration of fungal morphology. *J. Gen. Microbiol* **1972**, *71*, 343-349.
23. Davis, J.A.; Sharma, S.; Mittra, S.; Sujatha, S.; Kanaujia, A.; Shukla, G.; Katiyar, C.; Lakshmi, B.S.; Bansal, V.S.; Bhatnagar, P.K. Antihyperglycemic effect of *Annona squamosa* hexane extract in type 2 diabetes animal model: PTP1B inhibition, a possible mechanism of action? *Indian J. Pharmacol* **2012**, *44*, 326–332. DOI: [10.4103/0253-7613.96304](https://doi.org/10.4103/0253-7613.96304).
24. Dutraa, F.F.; Alvesa, L.S.; Rodriguesa, D.; Fernandez, P.L.; de Oliveirac, R.B.; Golenbockc, D.T.; Zambonid, D.S.; Bozza, M.T. Hemolysis-induced lethality involves inflammasome activation by heme. *PNAS* **2014**, E4110–E4118. DOI: [10.1073/pnas.1405023111](https://doi.org/10.1073/pnas.1405023111).
25. Jouda, J-B.; Tamokou, J-D.; Mbazoa, C.D.; Douala-Meli, C.; Sarkar, P.; Bag, P.K.; Wandji, J. Antibacterial and cytotoxic cytochalasins from the endophytic fungus *Phomopsis* sp. harbored in *Garcinia kola* (Heckel) nut. *BMC Complement. Altern. Med* **2016**, *16*: 462. DOI: [10.1186/s12906-016-1454-9](https://doi.org/10.1186/s12906-016-1454-9).
26. Lee, J.; Yi, J-M.; Kim, H.; Lee, Y.J.; Park, J-S.; Bang, O-S.; No Soo Kim, N-S. Cytochalasin H, an active anti-angiogenic constituent of the ethanol extract of *Gleditsia sinensis* Thorns. *Biol. Pharmacol. Bull* **2014**, *37*, 6–12.
27. Graziano, T.S.; Cuzzullin, M.C.; Franco, G.C.; Schwartz-Filho, H.O.; deAndrade, E.D.; Groppo, F.C.; Cogo-Müller, K. Statins and antimicrobial effects: Simvastatin as a potential drug against *Staphylococcus aureus* biofilm. *PLoS ONE* **2015**, *10*(5): e0128098. DOI: [10.1371/journal.pone.0128098](https://doi.org/10.1371/journal.pone.0128098).
28. Alberts, A.W.; Chen, J.; Kuron, G.; Hunt, V.; Huff, J.; Hoffman, C.; Rothrock, J., et al. Mevinolin: A highly potent competitive inhibitor of hydroxymethylglutaryl-coenzyme a reductase and a cholesterol-lowering agent. *Proc. Natl. Acad. Sci. USA* **1980**, *77*, 3957-3961.
29. Mahmoud, A.M.; Al-Abd, A.M.; Lightfoot, D.A.; Hany A.; El-Shemy, H.A. Anti-cancer characteristics of mevinolin against three different solid tumor cell lines was not solely p53-dependent. *J. Enzyme Inhib. Med. Chem* **2012**, *27*, 673-679. DOI: [10.3109/14756366.2011.607446](https://doi.org/10.3109/14756366.2011.607446).
30. Liu, Y.N.; Xue, J.H.; Feng, N.; Wu, P.; Liu, X.Z.; Wei, X.Y. A new cyclodipeptide from the cultures of *Geotrichum candidum*. *Chin. Chem. Lett* **2007**, *18*, 1081–1083. DOI: [10.1016/j.ccl.2007.07.003](https://doi.org/10.1016/j.ccl.2007.07.003).
31. Woloshuk, C.P.; Sisler, H.D.; Dutky, S.R. Mode of action of the azasteroid antibiotic 15-Aza-24-Methylene-D-Homocholesta-8,14-Dien-3f8-ol in *Ustilago maydis*. *Antimicrob. Agents Chemother* **1979**, *16*, 98-103.

32. <https://www.google.ch/patents/US4008238>
33. <https://www.google.ch/patents/US40082>
34. <https://www.google.ch/patents/US40082>
35. Takahata, H.; Momose, T. Simple indolizidine alkaloids In: The alkaloids: chemistry and pharmacology. 44, 189-256. Academic Press, **1993**, The United States. pp. 245.
36. Manzeera, A.S.; Sireesha, P.N.; Aswini, M.; Rao, P.M.; Sree, K.N.; Mallikharjunarao, K.L.N. Synthesis and anti-inflammatory activity of pyrazine derivatives. *Asian J. Res. Pharmacol. Sci. Biotech* **2013**, 1, 10-15.
37. Kumar, M.S.; Pal, A.K. Investigation of bioactivity of extracts of Marine Sponge, *Spongosorites halichondrioides* (Dendy, 1905) from western coastal areas of India. *Asian Pac. J. Trop. Biomed* **2012**, S1784-S1789.
38. Strom, K.; Sjogren, J.; Broberg, A.; Schnurer, J. *Lactobacillus plantarum* MiLAB 393 produces the antifungal cyclic dipeptides cyclo(L-Phe-L-Pro) and cyclo(L-Phe-trans-4-OH-L-Pro) and 3-Phenyllactic acid. *Appl. Environ. Microbiol* **2002**, 68, 4322-4327. DOI: [10.1128/AEM.68.9.4322-4327.2002](https://doi.org/10.1128/AEM.68.9.4322-4327.2002).
39. Kumarihamy, M.; Khan, S.I.; Jacob, M.; Tekwani, B.L.; Duke, S.O.; Ferreira, D.; Nanayakkara, N.P.D. Antiprotozoal and antimicrobial compounds from the plant pathogen *Septoria pistaciarum*. *J. Nat. Prod* **2012**, 75, 883-889. DOI: [10.1021/np200940b](https://doi.org/10.1021/np200940b).
40. Alshaibani, M.M.; MohamadZin, N.; Jalil, J.; Sidik, N.M.; Ahmad, S.J.; Kamal, N.; Edrada-Ebel, R. Isolation, purification, and characterization of five active diketopiperazine derivatives from endophytic *Streptomyces* SUK 25 with antimicrobial and cytotoxic activities. *J. Microbiol. Biotechnol* **2017**, 27, 1249-1256. DOI: [10.4014/jmb.1608.08032](https://doi.org/10.4014/jmb.1608.08032).
41. Abdel-Lateff, A. Chaetominedione, a new tyrosine kinase inhibitor isolated from the algicolous marine fungus *Chaetomium* sp. *Tetrahedron Lett* **2008**, 49, 6398-6400. DOI: [10.1016/j.tetlet.2008.08.064](https://doi.org/10.1016/j.tetlet.2008.08.064).
42. [https://openi.nlm.nih.gov/detailedresult.php?img=PMC4483665\\_marinedrugs-13-03950-g018&req=4](https://openi.nlm.nih.gov/detailedresult.php?img=PMC4483665_marinedrugs-13-03950-g018&req=4)
43. Gianetti, B.M.; Steghlich, W.; Quack, W.; Anke, T.; Oberwinkler, F. Antibiotics from basidiomycetes, VI. Merulinic acids A, B, and C, new antibiotics from *Merulinus tremellosus* and *Phlebia radiata*. *Z. Naturforsch C* **1978**, 33(11-12), 807-816.
44. [http://www.genome.jp/dbget-bin/www\\_bget?dr:D02899](http://www.genome.jp/dbget-bin/www_bget?dr:D02899)
45. <https://en.wikipedia.org/wiki/Citrinin>
46. Johannessen, L.N.A.M.; Nilsen, A.M.; Lovik, M. The mycotoxins citrinin and gliotoxin differentially affect production of the pro-inflammatory cytokines tumour necrosis factor- $\alpha$  and interleukin-6, and the anti-inflammatory cytokine interleukin-10. *Clin. Exp. Allergy* **2005**, 35, 782-789. DOI: [10.1111/j.1365-2222.2005.02249.x](https://doi.org/10.1111/j.1365-2222.2005.02249.x).
47. Andrade, R.; Ayer, W.A.; Trifonov, L.S. The metabolites of *Trichoderma longibrachiatum*. III. Two new tetronic acids: 5-Hydroxyvertinolide and bislongiquinolide. *Aust. J. Chem* **1997**, 50, 255-257.
48. Derntl, C.; Guzman-Chavez, F.; Mello-de-Sousa, T.M.; Busse, H-J.; Driessen, A.J.M.; Mach, R.L.; Mach-Aigner, A.R. *In vivo* study of the sorbicillinoid gene cluster in *Trichoderma reesei*. *Front. Microbiol* **2017**, 8:2037. DOI: [10.3389/fmicb.2017.02037](https://doi.org/10.3389/fmicb.2017.02037).
49. Nissen, L.; Zatta, A.; Stefanini, I.; Grandi, S.; Sgorbati, B.; Biavati, B.; et al. Characterization and antimicrobial activity of essential oils of industrial hemp varieties (*Cannabis sativa* L.). *Fitoterapia* **2010**, 81, 413-419. DOI: [10.1016/j.fitote.2009.11.010](https://doi.org/10.1016/j.fitote.2009.11.010).
50. Russo, E.B. Taming THC: potential cannabis synergy and phytocannabinoid-terpenoid entourage effects. *Brit. J. Pharmacol* **2011**, 163, 1344-1364. DOI: [10.1111/j.1476-5381.2011.01238.x](https://doi.org/10.1111/j.1476-5381.2011.01238.x).
51. Hao, D.; Xiao, J.G.; Pei G.X. Medicinal plants: Chemistry, biology and omics. Elsevier Science, **2015**, pp. 694.

52. Marei, G.I.K.H.; Rasoul, M.A.A.; Abdelgaleil, S.A.M. Comparative antifungal activities and biochemical effects of monoterpenes on plant pathogenic fungi. *Pest Biochem. Physiol* **2012**, *103*, 56-61.
53. Quintans-Júnior, L.; Moreira, J.C.F.; Pasquali, M.A.B.; Rabie, S.M.S., et al. Antinociceptive activity and redox Profile of the Monoterpenes(+)-Camphene, p-Cymene, and Geranyl Acetate in Experimental Models. *ISRN Toxicol* **2013**, 459530. DOI: [10.1155/2013/459530](https://doi.org/10.1155/2013/459530).
54. Vallianou, I.; Peroulis, N.; Pantazis, P.; Hadzopoulou-Cladaras, M. Camphene, a plant-derived monoterpene, reduces plasma cholesterol and triglycerides in hyperlipidemic rats independently of HMG-CoA reductase activity. *PLoS ONE* **2011**, *6*: e20516. DOI: [10.1371/journal.pone.0020516](https://doi.org/10.1371/journal.pone.0020516).
55. Lingappa, B.T.; Prasad, M.; Lingappa, Y.; Hunt, D.F.; Biemann, K. Phenethyl alcohol and tryptophol: Autoantibiotics produced by the fungus *Candida albicans*. *Science* **1969**, *163* (3863), 192-194. DOI: [10.1126/science.163.3863.192](https://doi.org/10.1126/science.163.3863.192).
56. Nakahara, K.; Alzoreky, N.S.; Yoshihashi, T.; Nguyen, H.T.T.; Trakoontivakorn, G. Chemical composition and antifungal activity of essential oil from *Cymbopogon nardus* (Citronella grass). *JARQ* **2003**, *37*, 249-252.
57. Rajapakse, N.W.; De Miguel, C.; Das, S.; Mattson, D.L. Exogenous L-arginine ameliorates angiotensin II-induced hypertension and renal damage in rats. *Hypertension* **2008**, *52*, 1084-1090.
58. Frezza, C.; Mauro, C. Editorial: The Metabolic Challenges of Immune Cells in Health and Disease. *Front. Immunol* **2015**, *6*: 293. DOI: [10.3389/fimmu.2015.00293](https://doi.org/10.3389/fimmu.2015.00293).
59. Hammer, K.A.; Carson, C.F.; Riley, T.V. Effects of *Melaleuca alternifolia* (Tea Tree) essential oil and the major monoterpene component Terpinen-4-ol on the development of single- and multistep antibiotic resistance and antimicrobial susceptibility. *Antimicrob. Agents Chemother* **2012**, *56*, 909-915. DOI: [10.1128/AAC.05741-11](https://doi.org/10.1128/AAC.05741-11).
60. Hart, P.H.; Brand, C.; Carson, C.F.; Riley, T.V.; Prager, R.H.; Finlay-Jones, J. J. Terpinen-4-ol, the main component of the essential oil of *Melaleuca alternifolia* (tea tree oil), suppresses inflammatory mediator production by activated human monocytes. *Inflamm. Res* **2000**, *49*, 619-626.
61. Ebada, M.E. Cuminaldehyde: A potential drug candidate. *J. Pharmacol. Clin. Res* **2017**, *2*, 555585. DOI: [10.19080/JPCR.2017.02.555585002](https://doi.org/10.19080/JPCR.2017.02.555585002).
62. Gille, L.; Monzote, L.; Stamberg, W.; Staniek, K. Toxicity of ascaridole from *Chenopodium ambrosioides* in mammalian mitochondria. *BMC Pharmacol* **2010**, *10* (Suppl 1): A10. DOI: [10.1186/1471-2210-10-S1-A10](https://doi.org/10.1186/1471-2210-10-S1-A10).
63. Ferro, J.N.D.S.; de Aquino, F.L.T.; de Brito, R.G.; Santos, P.L.D. et al. Cyclo-Gly-Pro, a cyclic dipeptide, attenuates nociceptive behaviour and inflammatory response in mice. *Clin. Exp. Pharmacol. Physiol* **2015**, *42*, 1287-129. DOI: [10.1111/1440-1681.12480](https://doi.org/10.1111/1440-1681.12480).
64. Cao, R.; Peng, W.; Wang, Z.; Xu, Anlong.  $\beta$ -Carboline Alkaloids: Biochemical and Pharmacological Functions. *Curr. Med. Chem* **2007**, *14*, 479-500.
